# Supplementary material for: The effect of probiotics supplementation in postoperative cancer patients: a prospective pilot study
Source: PubMed Central journal article supplement — Ann Surg Treat Res. 2021 Oct 29;101(5):281–90. doi: 10.4174/astr.2021.101.5.281 (PMC8564079; doi:10.4174/astr.2021.101.5.281), 2021-10-29
Supplement: astr-101-281-s001.pdf [file astr-101-281-s001.pdf]

**Supplementary Table 1.** Type of surgery

| Characteristic                    | Data      |
|-----------------------------------|-----------|
| Colorectal cancer                 |           |
| Right hemicolectomy               | 4 (21.1)  |
| Left hemicolectomy                | 1 (5.3)   |
| Antrum resection                  | 10 (52.6) |
| Palliative resection              | 4 (21.1)  |
| Breast cancer                     |           |
| Wide excision sentinel node       | 2 (22.2)  |
| Wide excision axillary dissection | 5 (55.6)  |
| Modified radical mastectomy       | 2 (22.2)  |
| Gastric cancer                    |           |
| Subtotal gastrectomy              | 1 (100)   |
| Pancreatic cancer                 |           |
| Whipple operation                 | 1 (100)   |

Values are presented as number (%).
